# Supplementary figures and images for: The Role of Soluble Adenylyl Cyclase in the Regulation of Flagellar Motility in Ascidian Sperm
Source: MDPI journal article supplement (doi:10.3390/biom13111594), 2023-10-30

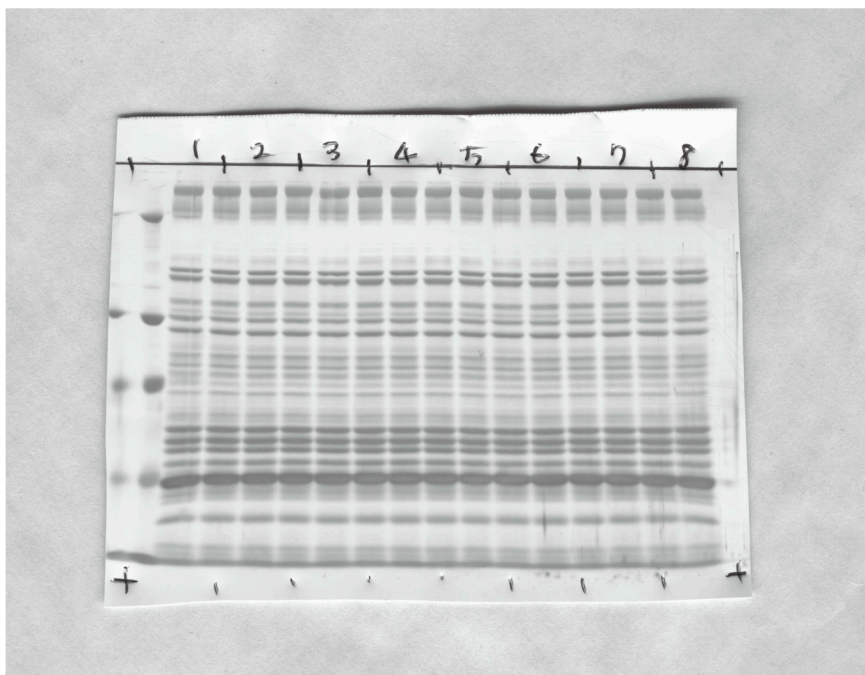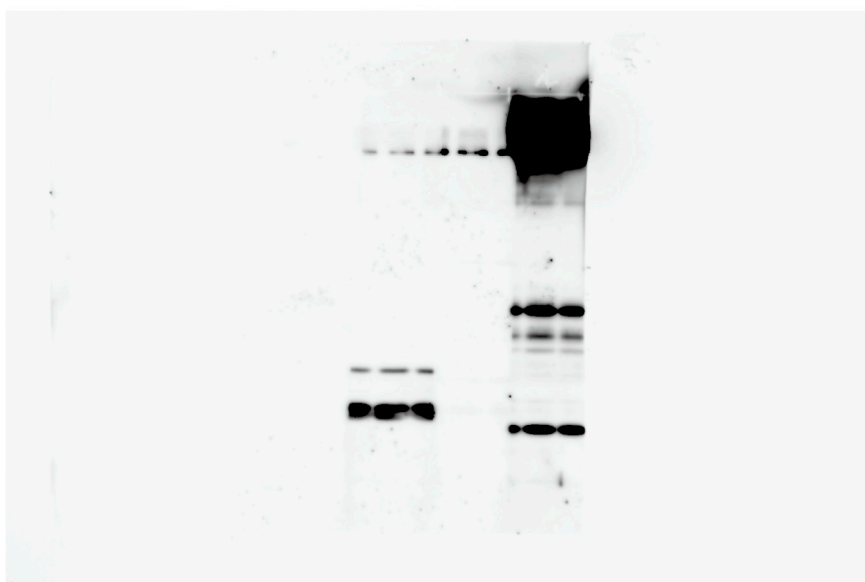

Figure S1: Original images of Figure 1B.

Supplement: s1 [file s1]
